# Supplementary material for: Feasibility of a Remotely Delivered Strength and Balance Training Program for Older Adults with Cancer
Source: MDPI journal article supplement (doi:10.3390/curroncol28060374), 2021-11-02
Supplement: s1 [file s1]

**Supplementary Table S1 – Findings from exit survey**

| <b>Survey Item *</b>                                                      | <b>Participant Response % (n)</b>             |
|---------------------------------------------------------------------------|-----------------------------------------------|
| The stable program improved my leg strength                               | 62% (16) answered quite a bit or very much    |
| The stable program improved my balance                                    | 65% (17) answered quite a bit or very much    |
| The program staff were knowledgeable                                      | 100% (26) answered quite a bit or very much   |
| The program staff were supportive                                         | 100% (26) answered quite a bit or very much   |
| Service received from program staff                                       | 100% (26) answered above average or excellent |
| How enjoyable was the exercise program?                                   | 100% (26) answered quite a bit or very much   |
| How beneficial do you think it will be for you to continue exercising?    | 100% (26) answered quite a bit or very much   |
| How motivated are you to continue to exercise?                            | 92% (24) answered quite a bit or very much    |
| How confident are you to continue exercising on your own?                 | 81% (21) answered quite a bit or very much    |
| Do you feel that the STABLE program prepared you to exercise on your own? | 92% (24) answered quite a bit or very much    |
| It was rewarding                                                          | 100% (26) answered quite a bit or very much   |
| It was a waste of my time                                                 | 100% (26) answered not at all                 |
| It will be useful for research helping others                             | 88% (23) answered quite a bit or very much    |
| It was useful to me personally                                            | 100% (26) answered quite a bit or very much   |
| I would recommend the exercise program to other cancer patients           | 100% (26) answered quite a bit or very much   |

\* On a Likert scale, participants were to select from a list ranging from: not at all, a little bit, somewhat, quite a bit, or very much
